# Supplementary material for: Relationship between Dietary Fiber Fermentation and Volatile Fatty Acids’ Concentration in Growing Pigs
Source: PubMed Central journal article supplement (PMC7070776; doi:10.3390/ani10020263), 2020-02-07
Supplement: animals-10-00263-s001.pdf [file animals-10-00263-s001.pdf]

**Supplementary Table S1** The dietary formulation in the recovery period of pigs after surgery in the present study

| Items                                     | Proportion |
|-------------------------------------------|------------|
| Corn                                      | 81.29      |
| Soybean meal                              | 14.60      |
| Dicalcium phosphate                       | 0.90       |
| Limestone                                 | 0.90       |
| NaCl                                      | 0.30       |
| Choline                                   | 0.06       |
| Premix <sup>†</sup>                       | 0.50       |
| L-Histidine                               | 0.03       |
| L-Isoleucine                              | 0.17       |
| L-Lysine-HCl                              | 0.63       |
| DL-Methionine                             | 0.04       |
| L-Phenylalanine                           | 0.08       |
| L-Threonine                               | 0.25       |
| L-Tryptophan                              | 0.08       |
| L-Valine                                  | 0.17       |
| Total                                     | 100        |
| Analyzed nutritive levels, % as fed basis |            |
| Gross energy, MJ/kg                       | 16.19      |
| Dry matter                                | 85.12      |
| Crude protein                             | 15.62      |
| Ether extract                             | 2.41       |
| Neutral detergent fibre                   | 12.22      |
| Acid detergent fibre                      | 2.11       |
| Ash                                       | 4.31       |
| Indispensable amino acids                 |            |
| Arginine                                  | 0.75       |
| Histidine                                 | 0.46       |
| Leucine                                   | 1.51       |
| Isoleucine                                | 0.62       |
| Lysine                                    | 1.18       |
| Methionine                                | 0.32       |
| Phenylalanine                             | 0.88       |
| Threonine                                 | 0.79       |
| Tryptophan                                | 0.19       |
| Valine                                    | 0.79       |

<sup>†</sup>Vitamin-mineral premix supplied the following per kg of diet: vitamin A, 5512 IU; vitamin D<sub>3</sub>, 2200 IU; vitamin E, 30 mg; vitamin K<sub>3</sub>, 2.2 mg; vitamin B<sub>12</sub>, 27.6 µg; riboflavin, 4 mg; pantothenic acid, 14 mg; niacin, 30 mg; choline chloride, 400 mg; folic acid, 0.7 mg; thiamine, 1.5 mg; pyridoxine, 3 mg; biotin, 44 µg; Mn (MnO), 40 mg; Fe (FeSO<sub>4</sub>·H<sub>2</sub>O), 75 mg; Zn (ZnO), 100 mg; Cu (CuSO<sub>4</sub>·5H<sub>2</sub>O), 100 mg; I (KI), 0.3 mg; Se (Na<sub>2</sub>SeO<sub>3</sub>), 0.3 mg.
